# Supplementary material for: Serovars, Virulence and Antimicrobial Resistance Genes of Non-Typhoidal Salmonella Strains from Dairy Systems in Mexico
Source: MDPI journal article supplement (doi:10.3390/antibiotics12121662), 2023-11-25
Supplement: s1 [file s1]

## Supplementary Materials

**Table S1.** Characteristics of the genomes and the assemblies of the strains of *Salmonella enterica* studied. GC: is the percentage of bases Guanine and Cytosine. N50 is the length of the shortest contig for which longer and equal length contigs cover at least 50 % of the assembly.

| Sample ID  | Number of reads | Total length | GC (%) | Coverage | Number of Contigs | Number of Contigs > 1000 bp | N50     |
|------------|-----------------|--------------|--------|----------|-------------------|-----------------------------|---------|
| SEDGO167B  | 776,737         | 4,593,846    | 52.24  | 84.9     | 40                | 20                          | 423,601 |
| SEAGS147B  | 526,530         | 4,589,491    | 52.24  | 57.6     | 42                | 25                          | 268,766 |
| SECOA310PC | 2,457,975       | 4,641,077    | 52.08  | 265.9    | 52                | 43                          | 230,122 |
| SEDGO304PC | 2,316,740       | 4,583,641    | 52.25  | 253.7    | 77                | 38                          | 249,025 |
| SEDGO294PC | 1,999,364       | 4,623,514    | 52.26  | 217.1    | 58                | 32                          | 683,919 |
| SECOA322PC | 660,221         | 4,492,678    | 52.29  | 73.8     | 43                | 23                          | 390,322 |
| SEDGO298PC | 221,338         | 4,747,819    | 52.17  | 23.4     | 113               | 81                          | 86,578  |
| SEDGO269B  | 2,188,845       | 4,904,065    | 52.10  | 224.1    | 200               | 123                         | 72,404  |
| SECOA255PC | 3,012,059       | 4,844,097    | 52.08  | 312.1    | 67                | 30                          | 254,933 |
| SEDGO276B  | 1,530,051       | 4,806,726    | 52.13  | 159.8    | 80                | 23                          | 464,704 |
| SECOA252B  | 366,610         | 4,830,844    | 52.04  | 38.1     | 61                | 32                          | 308,114 |
| SEDGO318B  | 2,410,367       | 4,782,667    | 52.23  | 253.0    | 82                | 37                          | 399,826 |
| SECOA320C  | 444,056         | 4,767,606    | 52.22  | 46.8     | 104               | 46                          | 225,681 |
| SECOA225PC | 1,184,561       | 4,622,798    | 52.21  | 128.6    | 47                | 16                          | 695,405 |
| SECOA246B  | 1,225,533       | 4,623,994    | 52.21  | 133.0    | 49                | 14                          | 533,824 |
| SECOA243PC | 4,625,764       | 4,633,902    | 52.22  | 501.1    | 69                | 20                          | 473,762 |
| SESLP86C   | 3,315,383       | 4,843,271    | 52.15  | 343.6    | 70                | 27                          | 728,136 |
| SETLX55C   | 3,471,853       | 4,666,274    | 52.22  | 373.5    | 47                | 33                          | 288,006 |
| SECOA245B  | 1,678,319       | 4,757,859    | 52.26  | 177.1    | 83                | 49                          | 240,267 |
| SEBC65B    | 3,637,120       | 4,669,748    | 52.22  | 391.0    | 70                | 28                          | 478,611 |
